# Supplementary material for: Crystal growth and optical properties of a noncentrosymmetric haloid borate, K3B6O10Br
Source: Royal Society of Chemistry journal article supplement (doi:10.1039/c0ce00725k), 2011-01-01
Supplement: c0ce00725k.pdf [file c0ce00725k.pdf]

## Supporting Information

### Crystal Growth and Optical Properties of a Noncentrosymmetric Haloid Borate, $K_3B_6O_{10}Br$

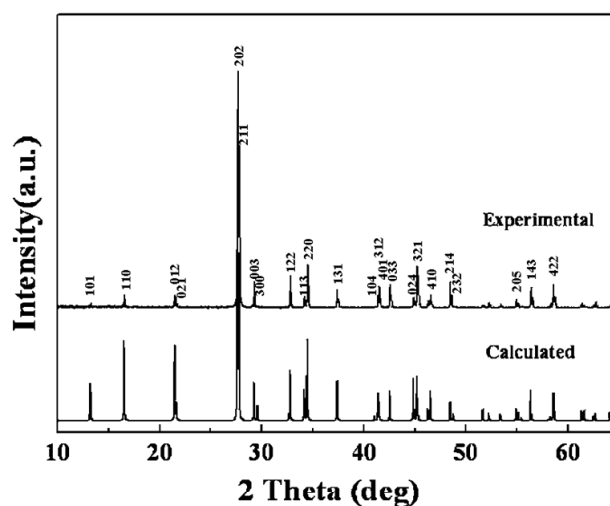

Figure S1. Experimental and calculated XRD patterns of the KBB.

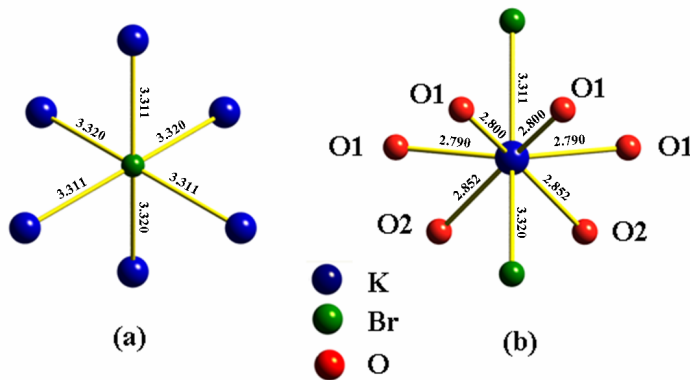

Figure S2. The coordinations and bond lengths (Å) of Br atoms (a), K atoms (b).

**Table S1.** Atomic coordinates and equivalent isotropic displacement parameters ( $\text{\AA}^2$ ) for KBB.  $U_{eq}$  is defined as one third of the trace of the orthogonalized  $U_{ij}$  tensor.

| Atoms | Wyckoff<br>positions | $x$        | $y$        | $z$         | $U_{eq}$   |
|-------|----------------------|------------|------------|-------------|------------|
| K(1)  | <i>9b</i>            | 0.84691(7) | 0.15309(7) | 0.20948(17) | 0.0139(5)  |
| B(1)  | <i>9b</i>            | 0.7545(3)  | 0.2455(3)  | -0.1300(7)  | 0.0049(12) |
| B(2)  | <i>9b</i>            | 0.9656(7)  | 0.4828(3)  | -0.0132(8)  | 0.0074(15) |
| O(1)  | <i>18c</i>           | 0.8995(3)  | 0.3331(3)  | -0.0483(3)  | 0.0082(7)  |
| O(2)  | <i>9b</i>            | 0.7782(2)  | 0.2218(2)  | -0.2835(5)  | 0.0082(9)  |
| O(3)  | <i>3a</i>            | 0.6667     | 0.3333     | -0.1232(8)  | 0.0017(14) |
| Br(1) | <i>3a</i>            | 0.6667     | 0.3333     | 0.32183(8)  | 0.0203(5)  |

**Table S2.** Selected bond lengths (Å) and angles (deg) for KBB.

|              |            |             |          |
|--------------|------------|-------------|----------|
| K(1)-O(1)#1  | 2.793(3)   | B(1)-O(2)   | 1.422(8) |
| K(1)-O(1)#2  | 2.793(3)   | B(1)-O(1)   | 1.470(4) |
| K(1)-O(1)    | 2.801(3)   | B(1)-O(1)#3 | 1.470(4) |
| K(1)-O(1)#3  | 2.801(3)   | B(1)-O(3)   | 1.539(6) |
| K(1)-O(2)#4  | 2.853(3)   |             |          |
| K(1)-O(2) #5 | 2.853(3)   | B(2)-O(1)   | 1.351(4) |
| K(1)-Br(1)   | 3.3111(14) | B(2)-O(1)#7 | 1.351(4) |
| K(1)-Br(1)#6 | 3.3207(15) | B(2)-O(2)#1 | 1.385(7) |

Symmetry transformations used to generate equivalent atoms:

(#1)  $-x+y+5/3, -x+4/3, z+1/3$ ; (#2)  $x-1/3, x-y-2/3, z+1/3$ ; (#3)  $-y+1, -x+1, z$ ; (#4)  $-y+4/3, x-y-1/3, z+2/3$ ;  
(#5)  $-x+y+4/3, -x+2/3, z+2/3$ ; (#6)  $x+1/3, y-1/3, z-1/3$ ; (#7)  $x, x-y, z$ .

**Table S3.** Bond valence analysis of the KBB.<sup>a,b</sup>

| Atom                     | O(1)                  | O(1)#1                | O(2)                  | O(3)                  | Br(1)                 | Br(1)#1               | $\Sigma_{\text{cations}}$ |
|--------------------------|-----------------------|-----------------------|-----------------------|-----------------------|-----------------------|-----------------------|---------------------------|
| K(1)                     | 0.164 <sup>[×2]</sup> | 0.169 <sup>[×2]</sup> | 0.143 <sup>[×2]</sup> |                       | <sup>[×3]</sup> 0.179 | <sup>[×3]</sup> 0.175 | 1.306                     |
| K(1)#1                   | 0.169 <sup>[×2]</sup> | 0.164 <sup>[×2]</sup> | 0.143 <sup>[×2]</sup> |                       | <sup>[×3]</sup> 0.175 | <sup>[×3]</sup> 0.179 | 1.306                     |
| B(1)                     | 0.766                 | 0.766                 | 0.848                 | <sup>[×3]</sup> 0.636 |                       |                       | 3.016                     |
| B(2)                     | 1.063                 | 1.063                 | 0.951                 |                       |                       |                       | 3.077                     |
| $\Sigma_{\text{anions}}$ | 2.162                 | 2.162                 | 2.085                 | 1.908                 | 1.062                 | 1.062                 |                           |

<sup>[a]</sup> Bond valences calculated with the program Bond Valence Calculator Version 2.00, Hormillosa, C., Healy, S., Stephen, T. McMaster University (1993).

<sup>[b]</sup> Valence sums calculated with the formula:  $S_i = \exp[(R_0 - R_i)/B]$ , where  $S_i$  = valence of bond "i",  $R_0$  is a constant dependent upon the bonded elements,  $R_i$  is the bond length of bond  $i$  and  $B$  equals 0.37. Left and right superscripts indicate the number of equivalent bonds for anions and cations, respectively.
